# Supplementary material for: Effect of vibration vs non-vibration foam rolling techniques on flexibility, dynamic balance and perceived joint stability after fatigue
Source: PeerJ journal article supplement (doi:10.7717/peerj.8000), 2019-11-26
Supplement: codebook.pdf [file codebook.pdf]

| Variable          | code                               |
|-------------------|------------------------------------|
| Treatment         | 0: No tratment                     |
|                   | 1: Foam Roller treatment           |
|                   | 2: Vibration foam roller treatment |
| Sex               | 1: Men                             |
|                   | 2: Women                           |
| p-stability knee  | 1: quite a bit worse               |
|                   | 2: slightly worse                  |
|                   | 3: about the same                  |
|                   | 4: slightly better                 |
|                   | 5: quite a bit better              |
| p-stability ankle | 1: quite a bit worse               |
|                   | 2: slightly worse                  |
|                   | 3: about the same                  |
|                   | 4: slightly better                 |
|                   | 5: quite a bit better              |
